# Supplementary material for: Extracellular Calcium Ion Concentration Regulates Chondrocyte Elastic Modulus and Adhesion Behavior
Source: MDPI journal article supplement (doi:10.3390/ijms221810034), 2021-09-17
Supplement: s1 [file s1]

# Supporting Information

## Extracellular Calcium ion Concentration Regulates Chondrocyte Elastic Modulus and Adhesion Behavior

Xingyu Shen <sup>1</sup>, Liqiu Hu <sup>1</sup>, Zhen Li <sup>2</sup>, Liyun Wang <sup>3</sup>, Xiangchao Pang <sup>4</sup>, Chun-Yi Wen <sup>5</sup> and Bin Tang <sup>1,\*</sup>

<sup>1</sup> Department of Biomedical Engineering, Southern University of Science and Technology, Shenzhen, 518055, China; 11749079@mail.sustc.edu.cn (S.X.); 11930748@mail.sustech.edu.cn (H.L.)

<sup>2</sup> School of Chemistry and Environmental Engineering, Jiangsu University of Technology, Changzhou 213001, China; lizhen198458@163.com

<sup>3</sup> Center for Biomechanical Research, Department of Mechanical Engineering, University of Delaware, Newark, DE, 19716, USA; lywang@udel.edu

<sup>4</sup> College of Materials Science and Engineering, Central South University of Forestry and Technology, Changsha, 410004, China; T20172373@csuft.edu.cn

<sup>5</sup> Department of Biomedical Engineering, The Hong Kong Polytechnic University, Hong Kong, 999077, China; chunyi.wen@polyu.edu.hk

\* Correspondence: tangb@sustech.edu.cn

### Table

**Table S1. The precise values of the results.**

| Ca <sup>2+</sup> concentration / mM      | 1.75       | 2.25      | 2.75       | 3.25       | 3.75       | Control   |
|------------------------------------------|------------|-----------|------------|------------|------------|-----------|
| Young's modulus / KPa                    | 1202 ± 250 | 1521 ± 75 | 1644 ± 396 | 1402 ± 211 | 1510 ± 155 |           |
| $F_{max}$ / nN                           | 1103 ± 439 | 1298 ± 77 | 1632 ± 724 | 1295 ± 526 | 1208 ± 633 | 130 ± 90  |
| $W_d$ / 10 <sup>-15</sup> J              | 1.3 ± 0.8  | 1.8 ± 0.6 | 2.3 ± 0.9  | 1.9 ± 0.9  | 1.6 ± 0.9  | 0.1 ± 0.1 |
| $F_{max}$ / nN (CWHM-12)                 | 308 ± 172  | 300 ± 200 | 410 ± 217  | 304 ± 149  | 381 ± 203  |           |
| $W_d$ / 10 <sup>-16</sup> J (CWHM-12)    | 3.6 ± 2.8  | 4.4 ± 4.2 | 3.8 ± 2.8  | 3.8 ± 2.7  | 4.6 ± 3.1  |           |
| $(F_{max} - F_{max}(CWHM-12)) / F_{max}$ | 72%        | 77%       | 75%        | 76%        | 68%        |           |
| $(W_d - W_d(CWHM-12)) / W_d$             | 72%        | 76%       | 83%        | 80%        | 71%        |           |

**Table S2. Primers for qPCR.**

| Gene                                  | Sequences (5'–3') |
|---------------------------------------|-------------------|
| Forward primer: GCTCCTCCTGAGCGCAAGTAC |                   |

| Gene                   | Sequences (5'–3')                                                                  |
|------------------------|------------------------------------------------------------------------------------|
| <i>β-actin</i>         | Reverse primer: GGACTCGTCATACTCCTGCTTGC                                            |
| <i>col2a1</i>          | Forward primer: CGCCGCTGTCCTTCGGTGTC<br>Reverse primer: AGGGCTCCGGCTTCCACACAT      |
| <i>acan</i>            | Forward primer: TGGGAACCAGCCTATACCCCAG<br>Reverse primer: CAGTTGCAGAAGGGCCTTCTGTAC |
| <i>myosin</i>          | Forward primer: CAGCAAGCTGCCGATAAGTAT<br>Reverse primer: CTTGTCGGAAGGCACCCAT       |
| <i>integrin beta 1</i> | Forward primer: CCTACTTCTGCACGATGTGATG<br>Reverse primer: CCTTTGCTACGGTTGGTTACATT  |
| <i>integrin beta 3</i> | Forward primer: GTGACCTGAAGGAGAATCTGC<br>Reverse primer: CCGGAGTGCAATCCTCTGG       |
| <i>collagen VI</i>     | Forward primer: ACAGTGACGAGGTGGAGATCA<br>Reverse primer: GATAGCGCAGTCGGTGTAGG      |
| <i>Collagen I</i>      | Forward primer: CGCCGCTGTCCTTCGGTGTC<br>Reverse primer: AGGGCTCCGGCTTCCACCACAT     |

**Figure**

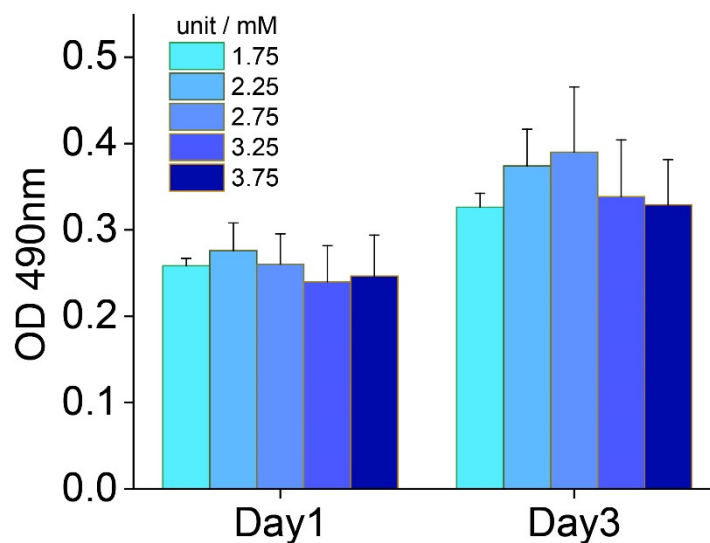

Figure S1. MTT assay shows the proliferation of chondrocytes at day 1 and day 3. No statistic difference in each groups.

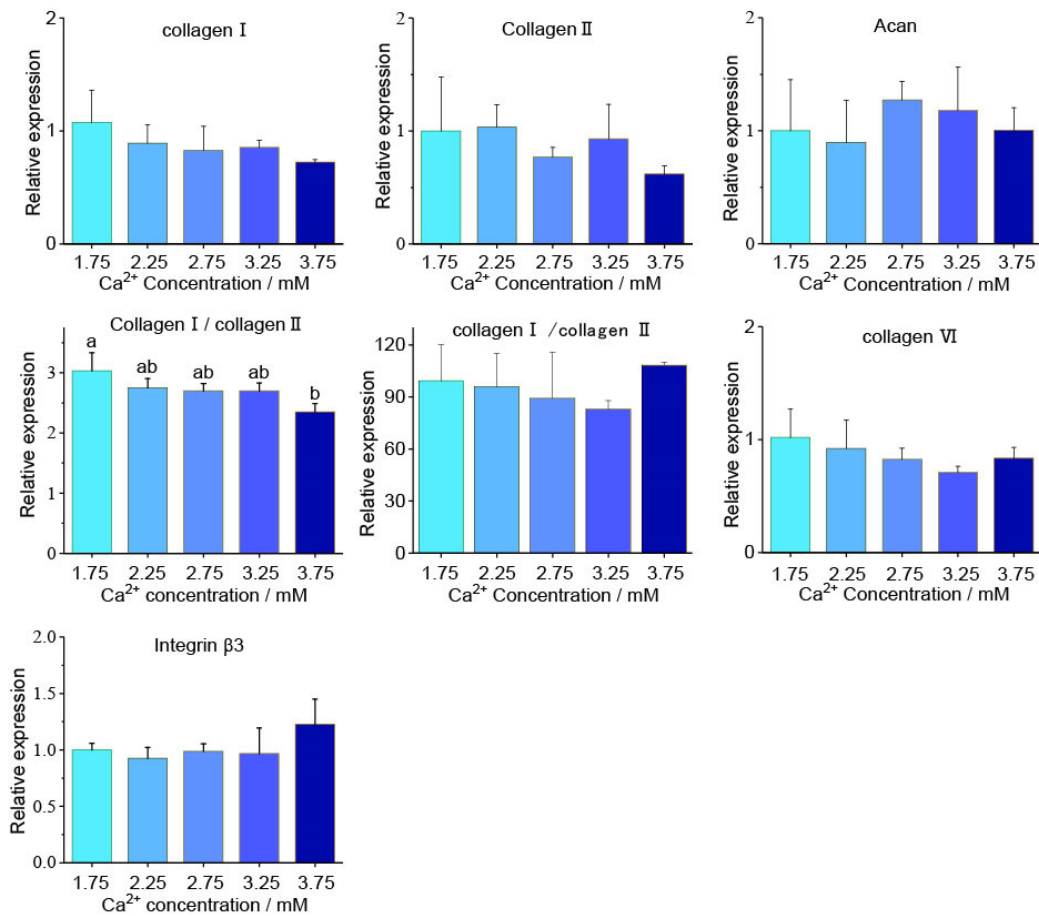

Figure S2. The expression of *collagen II*, *collagen I*, *collagen VI*, *integrin $\beta 3$* , and *aggrecan* has no significant difference.

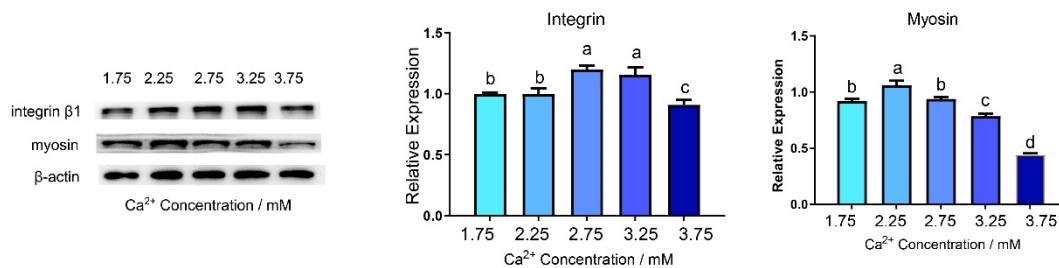

Figure S3. Western blot shows that the trend of *myosin II* and *integrin  $\beta 1$*  expression level is similar to that of qPCR and immunofluorescence results.

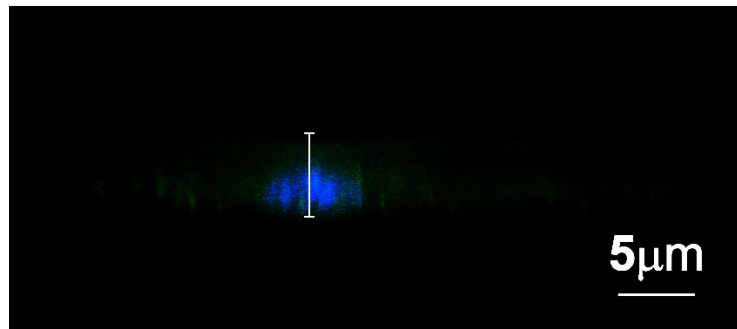

Figure S4. The height of chondrocytes was about 6  $\mu\text{m}$  measured by confocal laser scanning microscope. Blue: DAPI; green: phalloidin.
